# Supplementary material for: Genome-wide study of an elite rice pedigree reveals a complex history of genetic architecture for breeding improvement
Source: PubMed Central journal article supplement (PMC5379486; doi:10.1038/srep45685), 2017-04-04
Supplement: srep45685-s1.pdf [file srep45685-s1.pdf]

## Supporting Information

Article title: Genome-wide study of an elite rice pedigree reveals a complex history of genetic architecture for breeding improvement

Authors: Shaoxia Chen, Zechuan Lin, Degui Zhou, Chongrong Wang, Hong Li, Renbo Yu, Hanchao Deng, Xiaoyan Tang, Shaochuan Zhou, Xing Wang Deng and Hang He

The following Supporting Information is available for this article:

**Fig. S1** Distribution of the RiceSNP50 array on 12 chromosomes

**Fig. S2** Selective sweep (SSW) distribution on 12 chromosomes

**Fig. S3** Gene function enrichment analysis of 7723 genes.

**Fig. S4** Proportion of blocks donated by cultivars in the pedigree of the main branch and Teqing branch.

**Fig. S5** Manhattan plots for the genome-wide association study

**Fig. S6** The relationship between PVE and retained probability in Huanghuazhan pedigree across all QTLs

**Fig. S7** Evaluations on effects of population size, heritability, and natural mutation rates on traits improving process

**Fig. S8** Quantitative traits in the major effect group

**Fig. S9** Quantitative traits in the major plus minor effect group

**Fig. S10** Quantitative traits in the complex interaction group

**Fig. S11** Functional enrichment analysis of the genes in HTBs and three group of cHTBs.

**Table S1** Statistics of block number and coverage of SSWs, haplotype blocks, HTBs and cHTBs over 12 chromosomes

**Table S2** Statistics of P-value cut-off and P-value after permutation for GWAS results from 2012, number of QTLs, and numbers of QTLs that overlapped with SSWs and HTBs

**Table S3** Statistics of P-value cut-off and P-value after permutation for GWAS results from 2013, number of QTLs, and numbers of QTLs overlapped with SSWs and HTBs

**Table S4** Repeatability of the phenotypic data in year 2012 and 2013

**Dataset S1** SSWs and agronomic genes in them

**Dataset S2** HTBs and agronomic genes in them and gene list with functional annotation in the commonly identified regions and uniquely identified regions

**Dataset S3** QTLs identified by GWAS of traits measured in 2012 and 2013 and reported agronomic genes in them

**Dataset S4** Approved year and breeding years of 99 cultivars

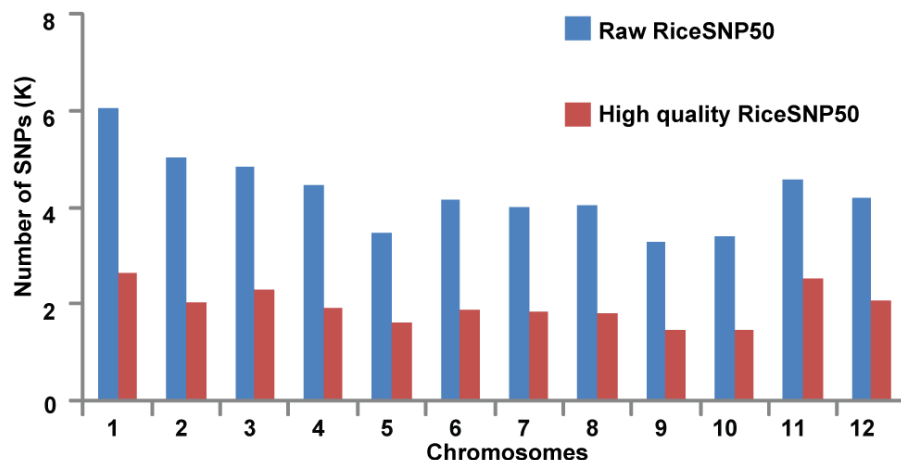

**Fig. S1 Distribution of the RiceSNP50 array on 12 chromosomes.** High-quality RiceSNP50 represents SNPs with missing rates less than 80% and minor allele frequency (MAF) more than 6% among 99 cultivars.

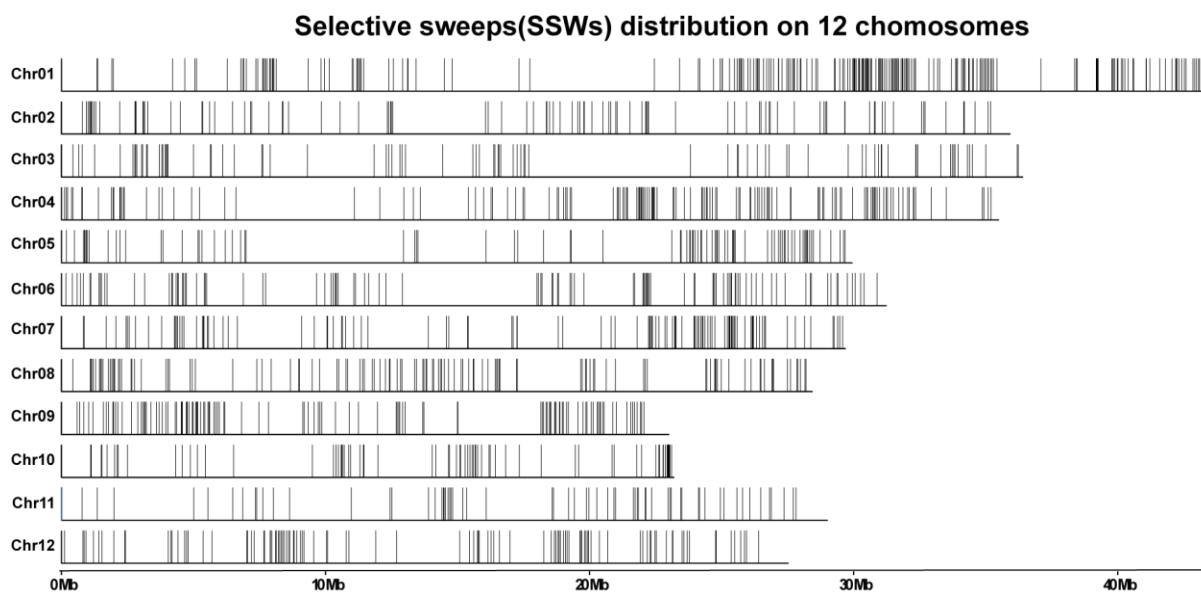

**Fig. S2 Selective sweep (SSW) distribution on 12 chromosomes.** The black bars show SSWs, and each pass is one chromosome.

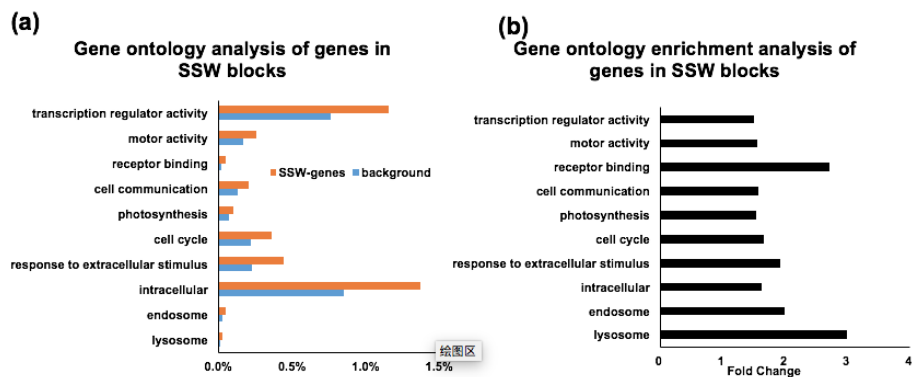

Fig. S3 Gene function enrichment analysis of 7723 genes in SSW blocks.

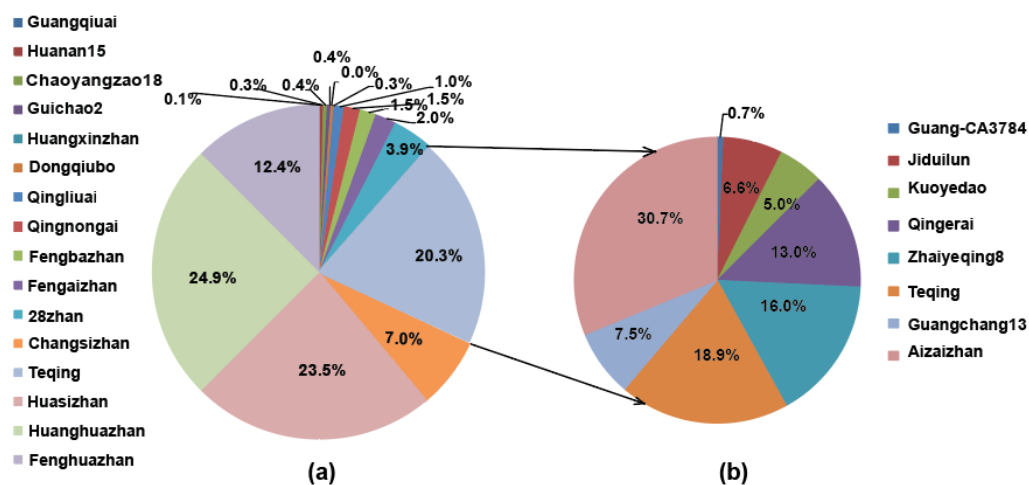

Fig. S4 Proportion of blocks donated by cultivars in the pedigree of the (a) main branch and (b) Teqing branch.

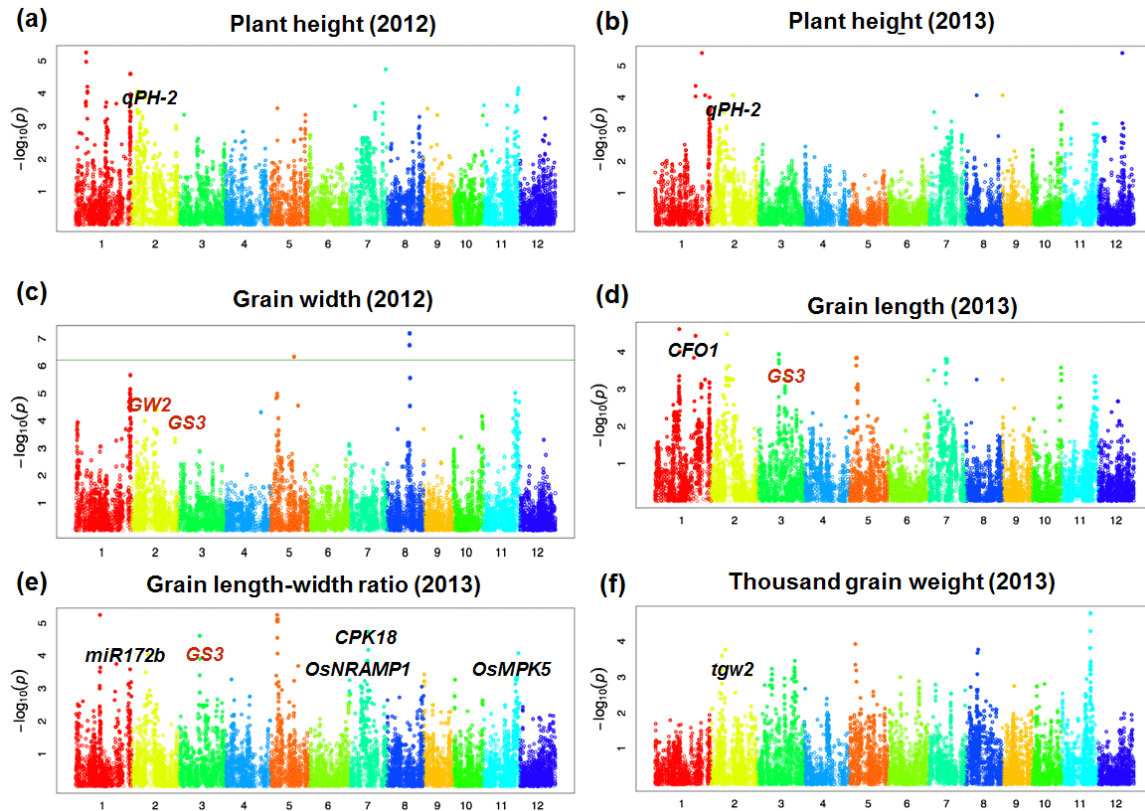

**Fig. S5** Manhattan plots for the genome-wide association study. (a) Plant height in 2012; (b) plant height in 2013, *qPH-2* is a major effect QTL for plant height in chromosome 2; (c) filled grain number per five plants; *qPLL7* located in chromosome 7 functions in pollen fertility; (d) grain length-width ratio, *qLWR-3* is reported to be a QTL for grain length-width ratio in chromosome 3; (e) seed setting rate, *qSS-2* is a QTL for spikelet fertility in chromosome 2; *pss4.1* is a QTL for seed setting rate in chromosome 4; (f) thousand grain weight; *tgw2* is a QTL for thousand grain weight in chromosome 2.

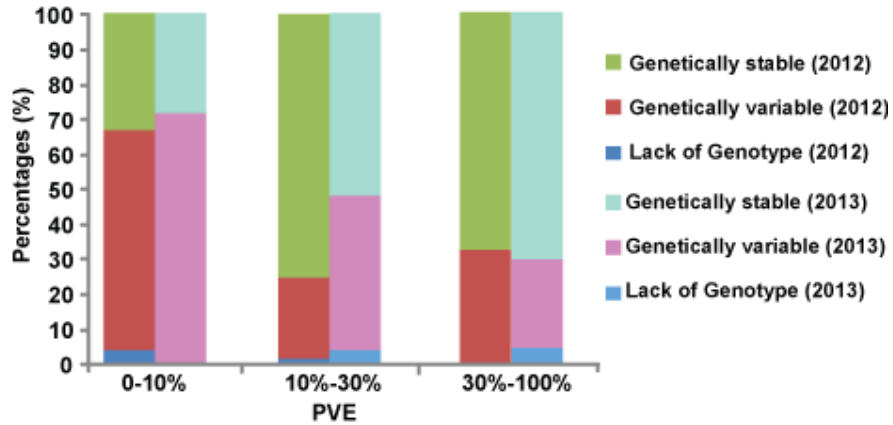

**Fig. S6** Evaluations on effects of population size, heritability, and natural mutation rates on **artificial selection**. The x-axis shows the PVE percentage. The y-axis shows the percentages of QTLs with different genetic events.

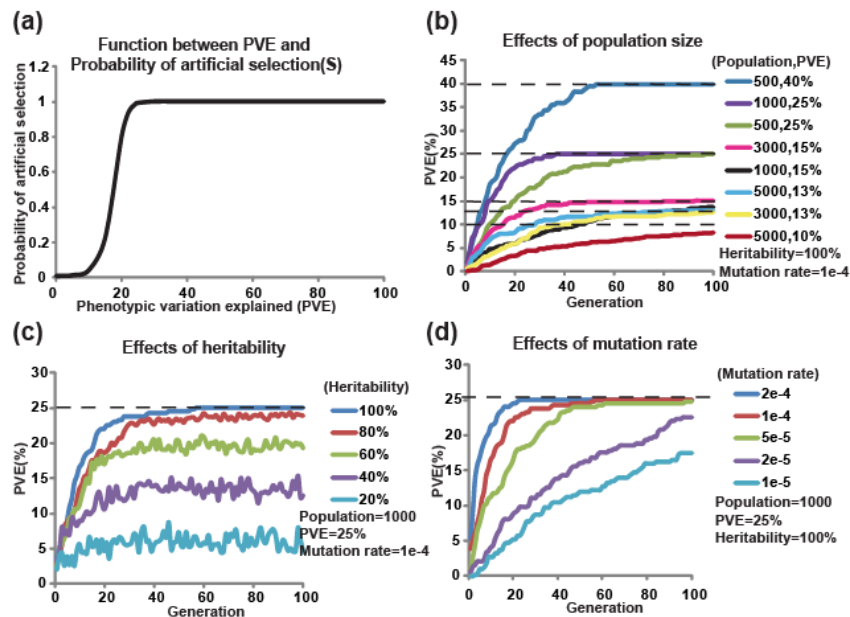

**Fig. S7** Evaluations on effects of population size, heritability, and natural mutation rates on **traits improving process**. (b) Function between PVE and selection probability in artificial selection. (c) Effect of population size on artificial selection. (d) Effects of heritability with fixed population size, PVE, and mutation rates. (e) Effects of mutation rate with fixed population size, PVE, and heritability.

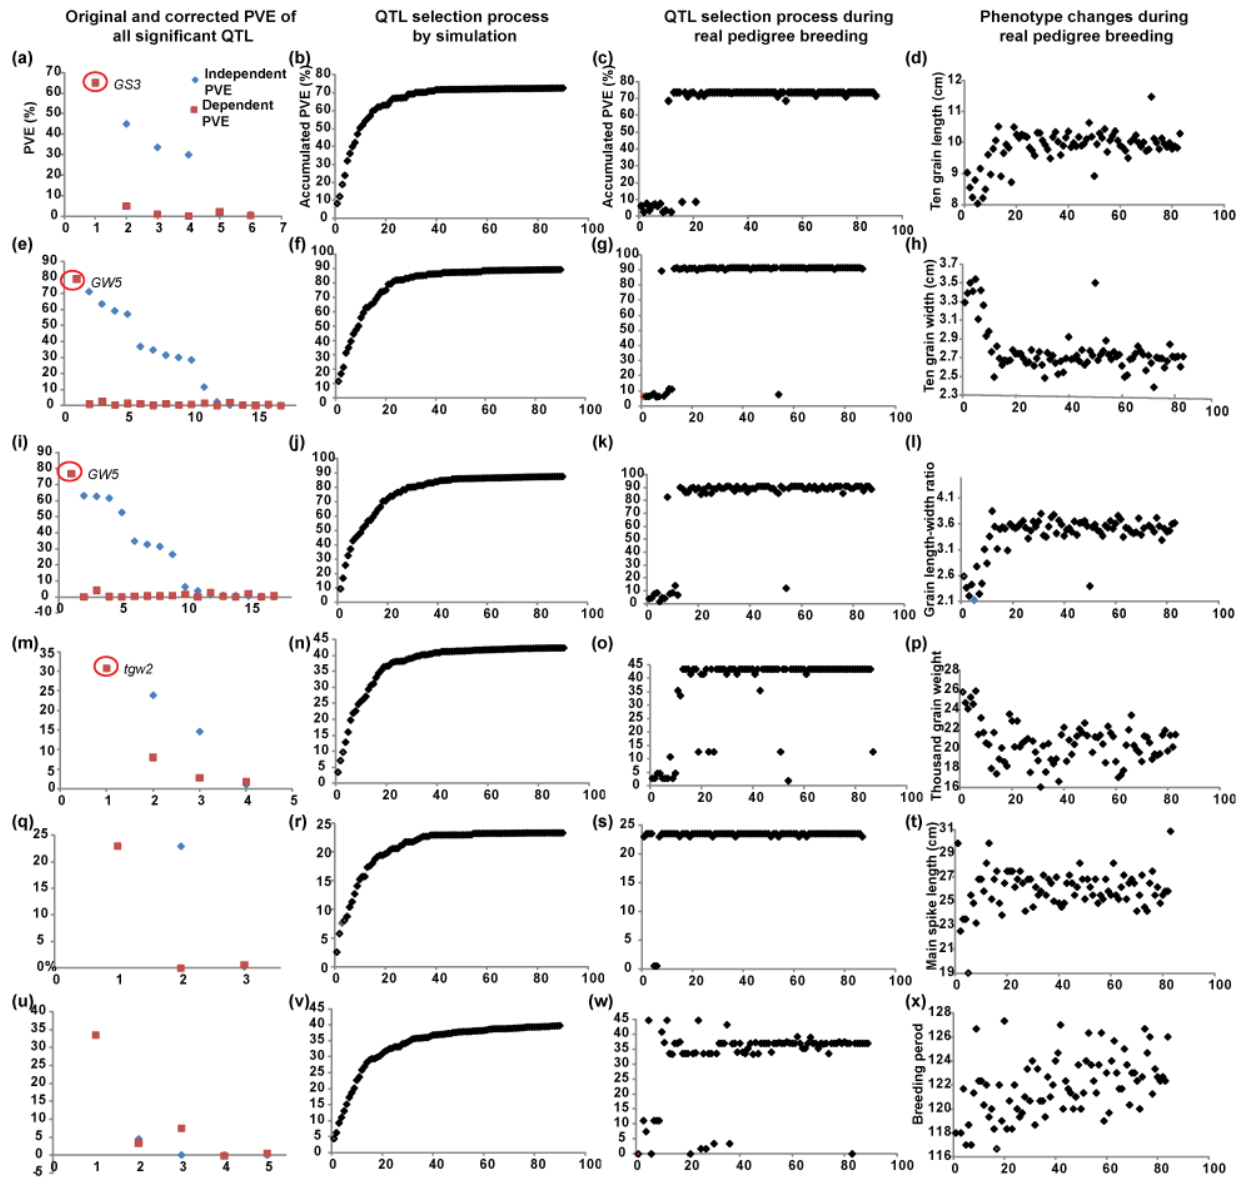

**Fig. S8 Quantitative traits in the major effect group.** Traits were influenced by one major effect QTL, which was the primary contributor to phenotypic variation, as well as several other QTLs that contributed little to the phenotypic variation. Phenotype traits shown here are most susceptible to artificial selection.

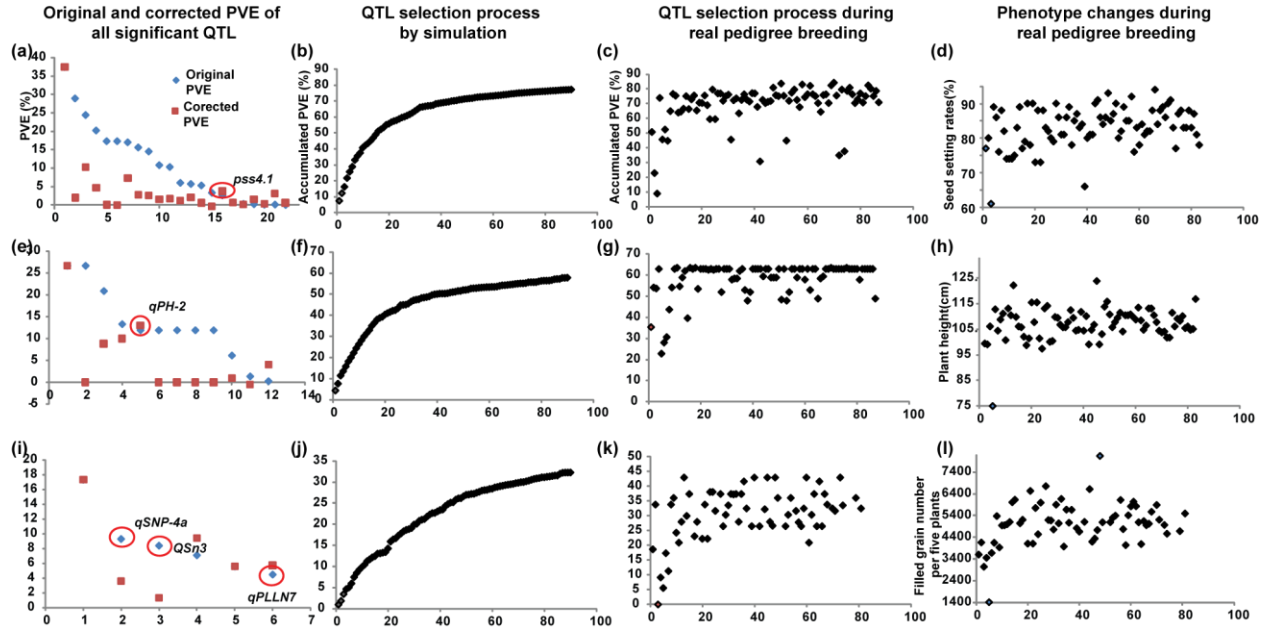

**Fig. S9** Quantitative traits in the major plus minor effect group. A major effect QTL and several minor effect QTLs play roles in the phenotypic variation of these traits.

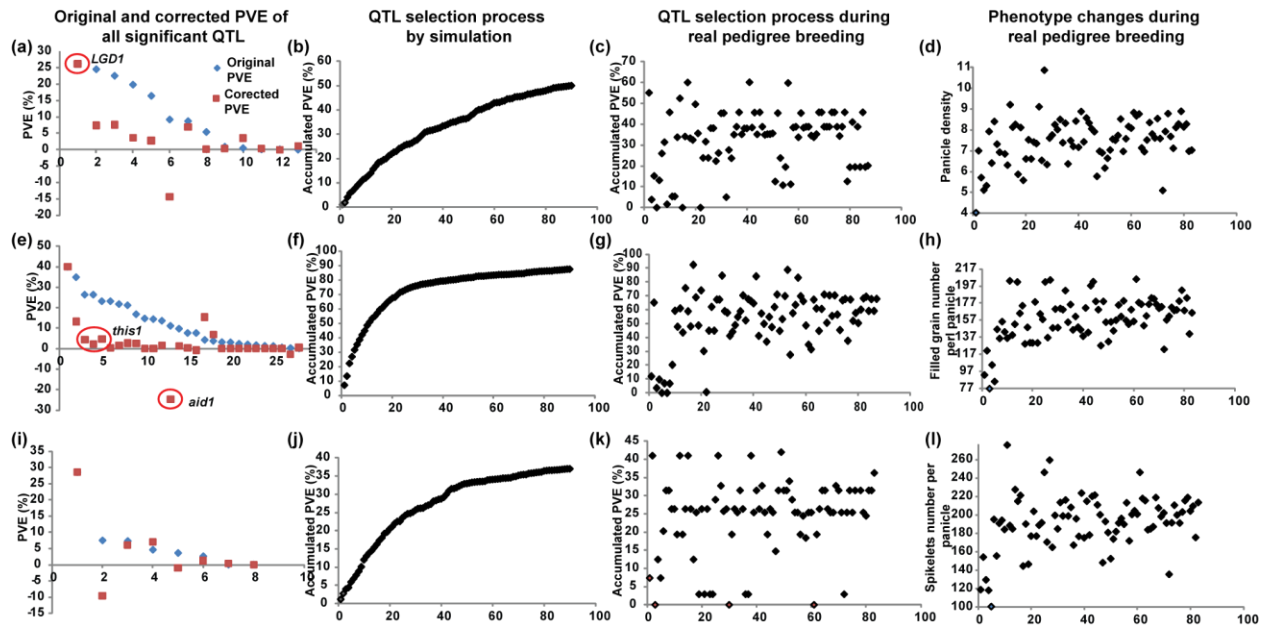

**Fig. S10** Quantitative traits in the complex interaction group. There are negative interactions among different combinations of QTLs for these traits.



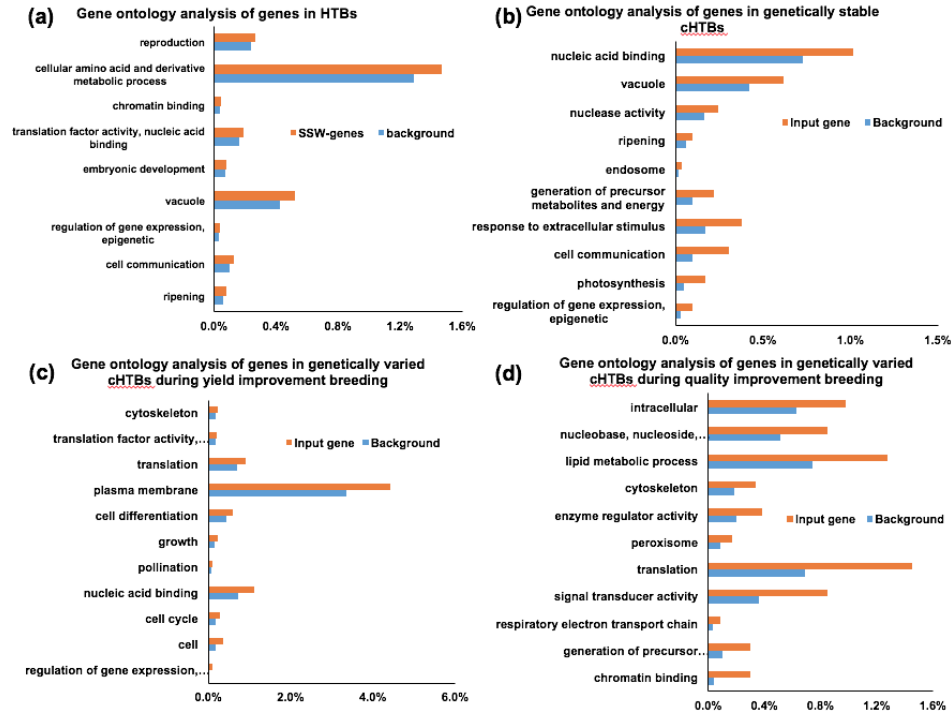

**Fig. S11** Functional enrichment analysis of the genes in HTBs and three group of cHTBs.

**Table S1** Statistics of block number and coverage of SSW blocks, haplotype blocks, HTBs and cHTBs over 12 chromosomes

| <b>Chromosome</b> | <b>SSW blocks number</b> | <b>SSW blocks coverage</b> | <b>Haplotype-block number</b> | <b>HTBs number</b> | <b>cHTBs number</b> | <b>cHTBs coverage</b> |
|-------------------|--------------------------|----------------------------|-------------------------------|--------------------|---------------------|-----------------------|
| Chr1              | 216                      | 8%                         | 315                           | 238                | 128                 | 29%                   |
| Chr2              | 99                       | 5%                         | 292                           | 238                | 112                 | 14%                   |
| Chr3              | 85                       | 4%                         | 218                           | 174                | 69                  | 16%                   |
| Chr4              | 140                      | 7%                         | 245                           | 123                | 62                  | 12%                   |
| Chr5              | 85                       | 5%                         | 187                           | 77                 | 40                  | 7%                    |
| Chr6              | 104                      | 6%                         | 174                           | 127                | 66                  | 18%                   |
| Chr7              | 110                      | 7%                         | 196                           | 160                | 72                  | 19%                   |
| Chr8              | 118                      | 7%                         | 228                           | 133                | 86                  | 12%                   |
| Chr9              | 116                      | 9%                         | 189                           | 185                | 108                 | 26%                   |
| Chr10             | 70                       | 5%                         | 183                           | 175                | 92                  | 28%                   |
| Chr11             | 65                       | 3%                         | 347                           | 287                | 152                 | 13%                   |
| Chr12             | 105                      | 6%                         | 266                           | 215                | 126                 | 20%                   |
| Total             | 1313                     | 6%                         | 2840                          | 2132               | 1113                | 18%                   |

**Table S2** Statistics of P-value cut-off and P-value after permutation for GWAS results from 2012, number of QTLs, and numbers of QTLs that overlapped with SSWs and HTBs

|                              | <b>P-value cut-off</b> | <b>P-value cut-off after permutation</b> | <b>Number of QTLs</b> | <b>PVE (%) of all QTLs</b> | <b># SSW-overlap</b> | <b># HTB-overlap</b> | <b># SSW/HTB-overlap</b> |
|------------------------------|------------------------|------------------------------------------|-----------------------|----------------------------|----------------------|----------------------|--------------------------|
| Flag leaf length             | 1.0E-04                | 3.1E-04                                  | 5                     | 49.5                       | 2                    | 3                    | 4                        |
| Flag leaf width              | 5.0E-04                | 4.4E-04                                  | 4                     | 38.6                       | 1                    | 3                    | 3                        |
| Flowering time               | 1.0E-04                | 1.2E-04                                  | 2                     | 29.8                       | 1                    | 2                    | 2                        |
| Empty grain number           | 5.0E-03                | 1.3E-03                                  | 3                     | 44.8                       | 1                    | 2                    | 2                        |
| Filled grain number          | 1.0E-04                | 1.1E-04                                  | 2                     | 12.0                       | 0                    | 0                    | 0                        |
| Plant height                 | 1.0E-04                | 1.0E-03                                  | 23                    | 86.5                       | 12                   | 12                   | 16                       |
| Effective spike per plant    | 1.0E-04                | 1.2E-03                                  | 19                    | 89.3                       | 10                   | 13                   | 14                       |
| Effective spike per acre     | 1.0E-04                | 1.9E-03                                  | 40                    | 95.2                       | 23                   | 31                   | 36                       |
| Yields                       | 5.0E-04                | 7.3E-04                                  | 9                     | 72.6                       | 2                    | 7                    | 7                        |
| Grain length-width ratio     | 1.0E-04                | 3.0E-03                                  | 31                    | 96.9                       | 14                   | 22                   | 24                       |
| Seed density                 | 5.0E-03                | 3.3E-03                                  | 9                     | 54.5                       | 1                    | 8                    | 8                        |
| Seed setting rates           | 1.0E-04                | 2.4E-04                                  | 2                     | 35.3                       | 1                    | 1                    | 1                        |
| Spike length                 | 1.0E-04                | 6.3E-04                                  | 16                    | 80.9                       | 8                    | 13                   | 13                       |
| Ten grain length             | 1.0E-04                | 1.5E-03                                  | 16                    | 86.1                       | 6                    | 12                   | 12                       |
| Ten grain width              | 1.0E-04                | 4.0E-03                                  | 31                    | 96.7                       | 15                   | 24                   | 25                       |
| Thousand grain weight        | 1.0E-04                | 4.5E-04                                  | 6                     | 56.9                       | 1                    | 4                    | 4                        |
| Spike number per five plants | 1.0E-04                | 1.3E-03                                  | 20                    | 89.3                       | 10                   | 13                   | 14                       |

**Table S3** Statistics of P-value cut-off and P-value after permutation for GWAS results from 2013, number of QTLs, and numbers of QTLs overlapped with SSWs and HTBs

|                                  | <b>P-value cut-off</b> | <b>P-value cut-off after permutation</b> | <b>Number of QTLs</b> | <b>PVE (%) of all QTLs</b> | <b># SSW-overlap</b> | <b># HTB-overlap</b> | <b># SSW/HTB-overlap</b> |
|----------------------------------|------------------------|------------------------------------------|-----------------------|----------------------------|----------------------|----------------------|--------------------------|
| Flag leaf length                 | 1.0E-03                | 1.9E-03                                  | 4                     | 31.9                       | 2                    | 3                    | 3                        |
| Flag leaf width                  | 1.0E-04                | 1.3E-04                                  | 3                     | 33.3                       | 0                    | 2                    | 2                        |
| Flowering time                   | 1.0E-03                | 1.1E-03                                  | 5                     | 44.6                       | 1                    | 3                    | 3                        |
| Empty grain number per panicle   | 5.0E-03                | 3.3E-03                                  | 9                     | 46.3                       | 4                    | 8                    | 8                        |
| Filled grain number per panicle  | 1.0E-03                | 6.8E-03                                  | 28                    | 81.3                       | 16                   | 21                   | 23                       |
| Empty grain number per 5 plants  | 5.0E-03                | 2.4E-03                                  | 9                     | 26.7                       | 1                    | 2                    | 3                        |
| Filled grain number per 5 plants | 5.0E-03                | 2.0E-03                                  | 6                     | 42.9                       | 3                    | 5                    | 5                        |
| Plant height                     | 1.0E-04                | 6.2E-04                                  | 12                    | 63.1                       | 4                    | 5                    | 7                        |
| Effective spike per plants       | 5.0E-03                | 7.9E-03                                  | 22                    | 58.9                       | 6                    | 16                   | 16                       |
| Grain length-width ratio         | 1.0E-04                | 1.1E-03                                  | 16                    | 90.9                       | 7                    | 13                   | 13                       |
| Seed density                     | 1.0E-03                | 1.4E-03                                  | 13                    | 84.1                       | 4                    | 10                   | 10                       |

|                             | <b>P-value cut-off</b> | <b>P-value cut-off after permutation</b> | <b>Number of QTLs</b> | <b>PVE (%) of all QTLs</b> | <b># SSW-overlap</b> | <b># HTB-overlap</b> | <b># SSW/HTB-overlap</b> |
|-----------------------------|------------------------|------------------------------------------|-----------------------|----------------------------|----------------------|----------------------|--------------------------|
| Seed setting rate           | 1.0E-03                | 5.3E-03                                  | 22                    | 84.2                       | 13                   | 19                   | 19                       |
| Spike length                | 1.0E-04                | 1.9E-04                                  | 3                     | 23.5                       | 1                    | 1                    | 2                        |
| Spikelet number per panicle | 1.0E-03                | 1.2E-03                                  | 8                     | 32.8                       | 3                    | 5                    | 6                        |
| Ten grain length            | 1.0E-04                | 2.6E-04                                  | 6                     | 73.7                       | 4                    | 5                    | 5                        |
| Ten grain width             | 1.0E-04                | 1.0E-03                                  | 17                    | 91.9                       | 10                   | 12                   | 13                       |
| Thousand grain weight       | 1.0E-04                | 1.9E-04                                  | 4                     | 43.4                       | 2                    | 3                    | 4                        |
| Grain weight                | 1.0E-04                | 2.2E-03                                  | 5                     | 40.1                       | 2                    | 1                    | 2                        |
| Spike number per 5 plants   | 1.0E-04                | 5.0E-03                                  | 13                    | 44.2                       | 5                    | 10                   | 10                       |

**Table S4** Repeatability of the phenotypic data in year 2012 and 2013

| Repeatability of the phenotypic data in year 2012 and 2013 (correlation R <sup>2</sup> ) |      |
|------------------------------------------------------------------------------------------|------|
| Flag leaf length                                                                         | 0.41 |
| Flag leaf width                                                                          | 0.28 |
| Flowering time                                                                           | 0.97 |
| Empty grain number                                                                       | 0.33 |
| Filled grain number                                                                      | 0.64 |
| Plant height                                                                             | 0.70 |
| Effective spike per plant                                                                | 0.11 |
| Spike number per five plants                                                             | 0.06 |
| Grain length-width ratio                                                                 | 0.85 |
| Seed density                                                                             | 0.60 |
| Seed setting rates                                                                       | 0.53 |
| Spike length                                                                             | 0.64 |
| Ten grain length                                                                         | 0.82 |
| Ten grain width                                                                          | 0.84 |
| Thousand grain weight                                                                    | 0.72 |
